# Supplementary material for: Autonomic cardiac regulation facilitates acute heat tolerance in rainbow trout:in situandin vivosupport
Source: Oxford University Press journal article supplement (doi:10.1242/jeb.194365), 2019-01-01
Supplement: jeb194365supp.pdf [file jeb194365supp.pdf]

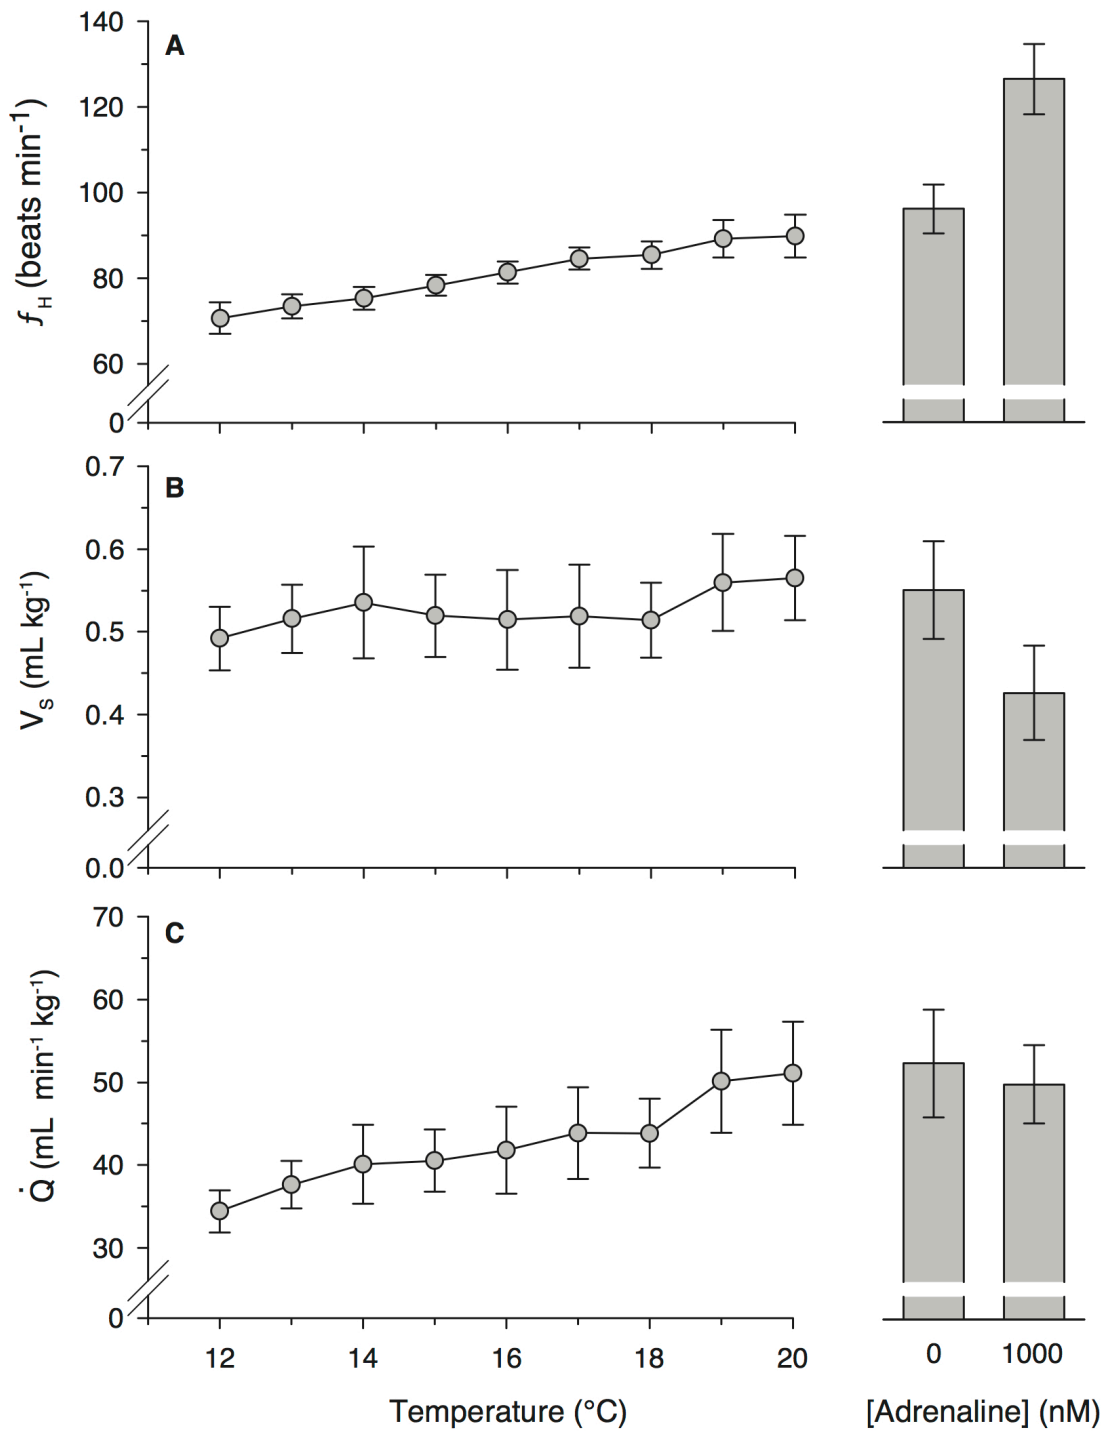

Figure S1. Heart rate ( $f_H$ ;A) stroke volume ( $V_s$ ;B) and cardiac output ( $\dot{Q}$ ;C) during acute warming to arrhythmia in an in situ perfused heart preparation ( $n=8$ ). Bar graphs show values at arrhythmia with and without maximal adrenergic stimulation. Flow measurements for  $V_s$  and  $\dot{Q}$  have not been temperature corrected.

## Table S1

[Click here to Download Table S1](#)
